# Supplementary material
Source: ML conference proceedings conference paper supplement (https://openaccess.thecvf.com/content/WACV2023/html/Liu_A_Deep_Neural_WACV_2023_paper.html)
Supplement: Supplementary file 1 [file Liu_A_Deep_Neural_WACV_2023_supplemental.pdf]

## Supplementary Materials

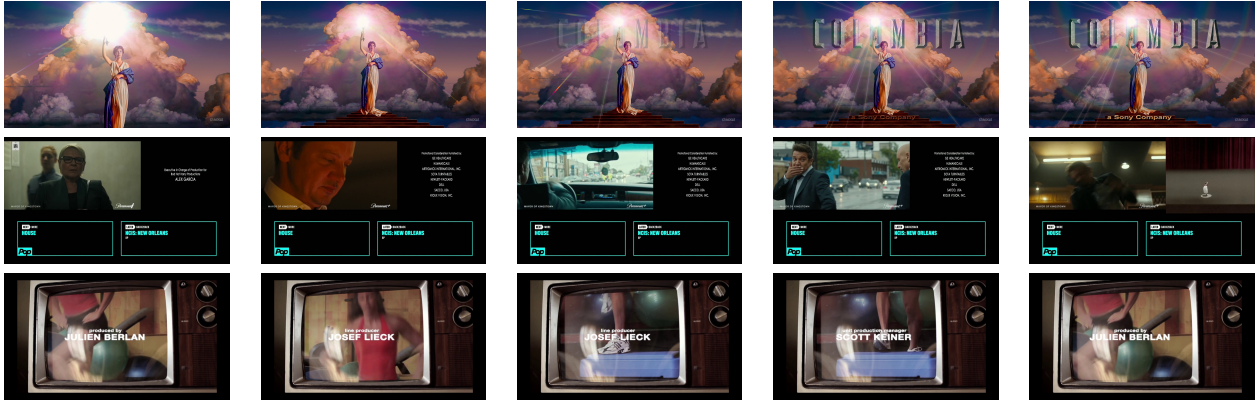

Figure 1. Sample images from web crawled *content* type video segments that are mis-classified as *Ad* type. Here images of one row are sampled from the same video segment in temporal order.

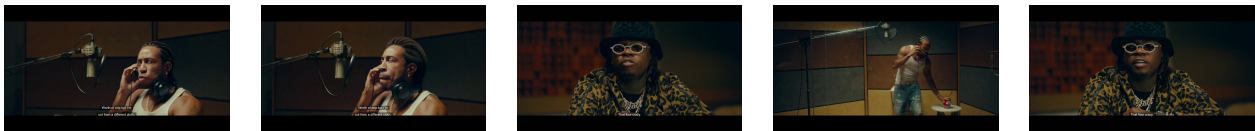

Figure 2. Images sampled in temporal order from a web crawled *Ad* type video segment that are mis-classified as *content* type.
